# Supplementary material for: Age-Period-Cohort Analysis of 1990–2003 Incidence Time Trends of Childhood Diabetes in Italy: The RIDI Study
Source: PubMed Central journal article supplement — Diabetes. 2010 Jun 21;59(9):2281–7. doi: 10.2337/db10-0151 (PMC2927951; doi:10.2337/db10-0151), 2010-06-21

## Online supplementary material

Geographical distribution of the registries contributing to the RIDI database

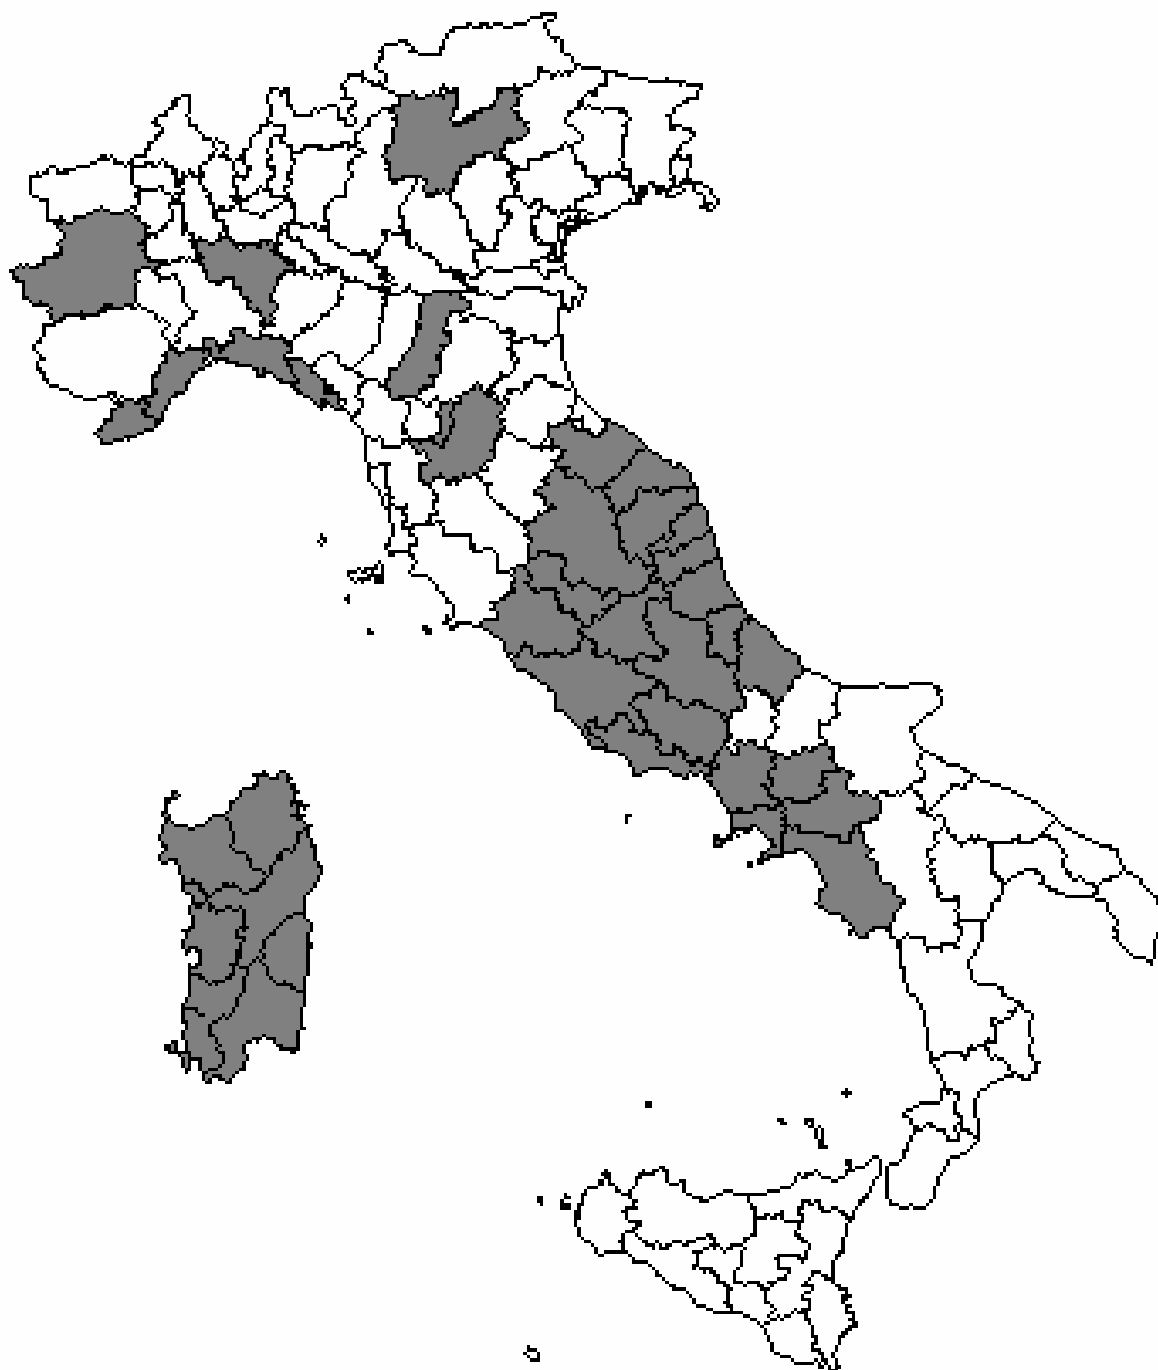

Supplement: supp_db10-0151_db100151OnlineAppendix.pdf [file supp_db10-0151_db100151OnlineAppendix.pdf]
